# Supplementary material
Source: Copernicus journal article supplement (doi:10.5194/egusphere-2026-3274)
Supplement: Supplementary file 1 [file egusphere-2026-3274-supplement.pdf]

## Supplementary material

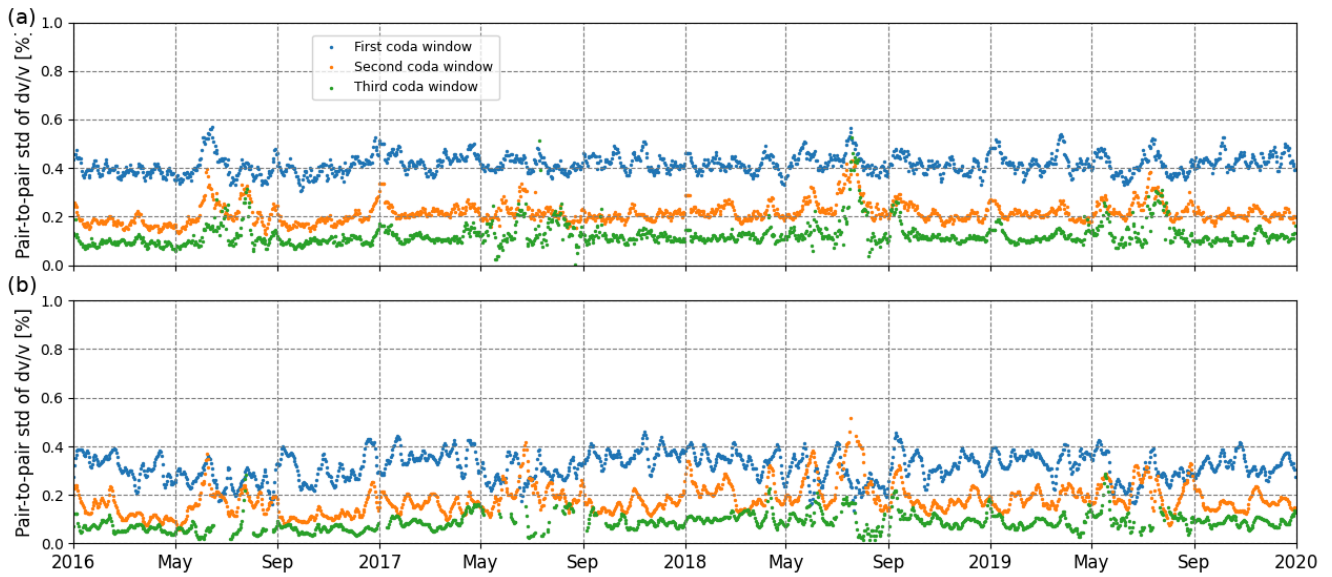

**Figure S1.** Pair-to-pair variability of the  $\delta v/v$  estimates for the full network and the path-selected subset. Daily standard deviation of  $\delta v/v$  values calculated across contributing station pairs for the three coda windows. Panel (a) shows results for all station pairs ( $N=190$ ), and panel (b) shows results for the path-selected subset with interstation distance  $<20$  km and azimuth  $60^\circ$ - $120^\circ$  ( $N=23$ ). The standard deviation represents pair-to-pair variability. The subset generally exhibits variability that is comparable to, and in many periods slightly lower than, that of the full network, while retaining a clearer seasonal mean signal.

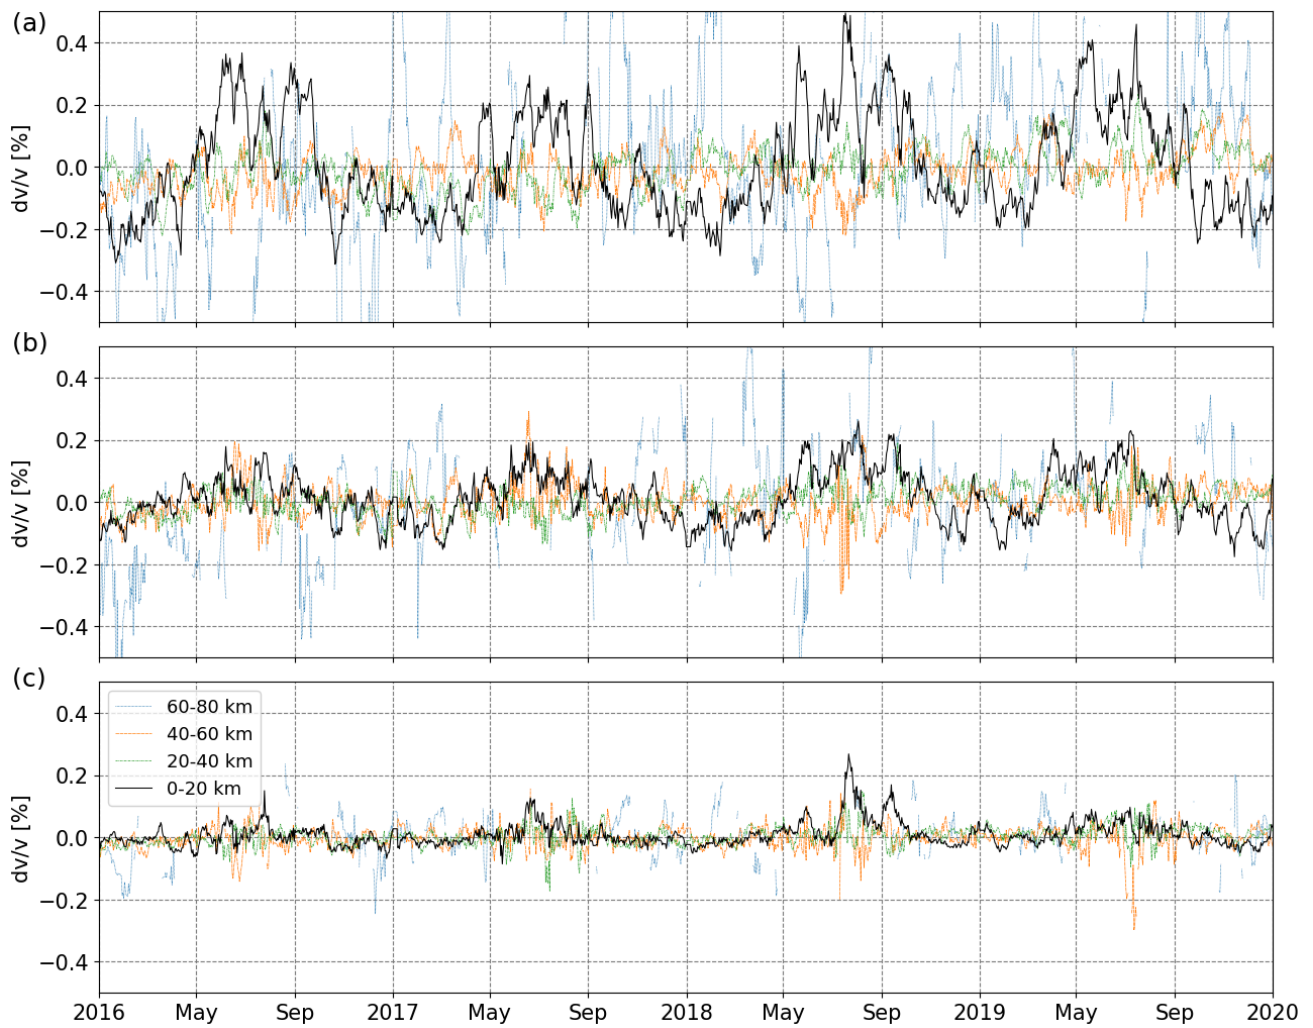

**Figure S2.**  $\delta v/v$  estimates for the entire region in the 0.1–0.5 Hz frequency band, computed using the first (a), second (b), and third (c) coda windows. The  $\delta v/v$  results are grouped by interstation distance. In each panel,  $\delta v/v$  result is highlighted for the pairs with interstation distance <20 km.

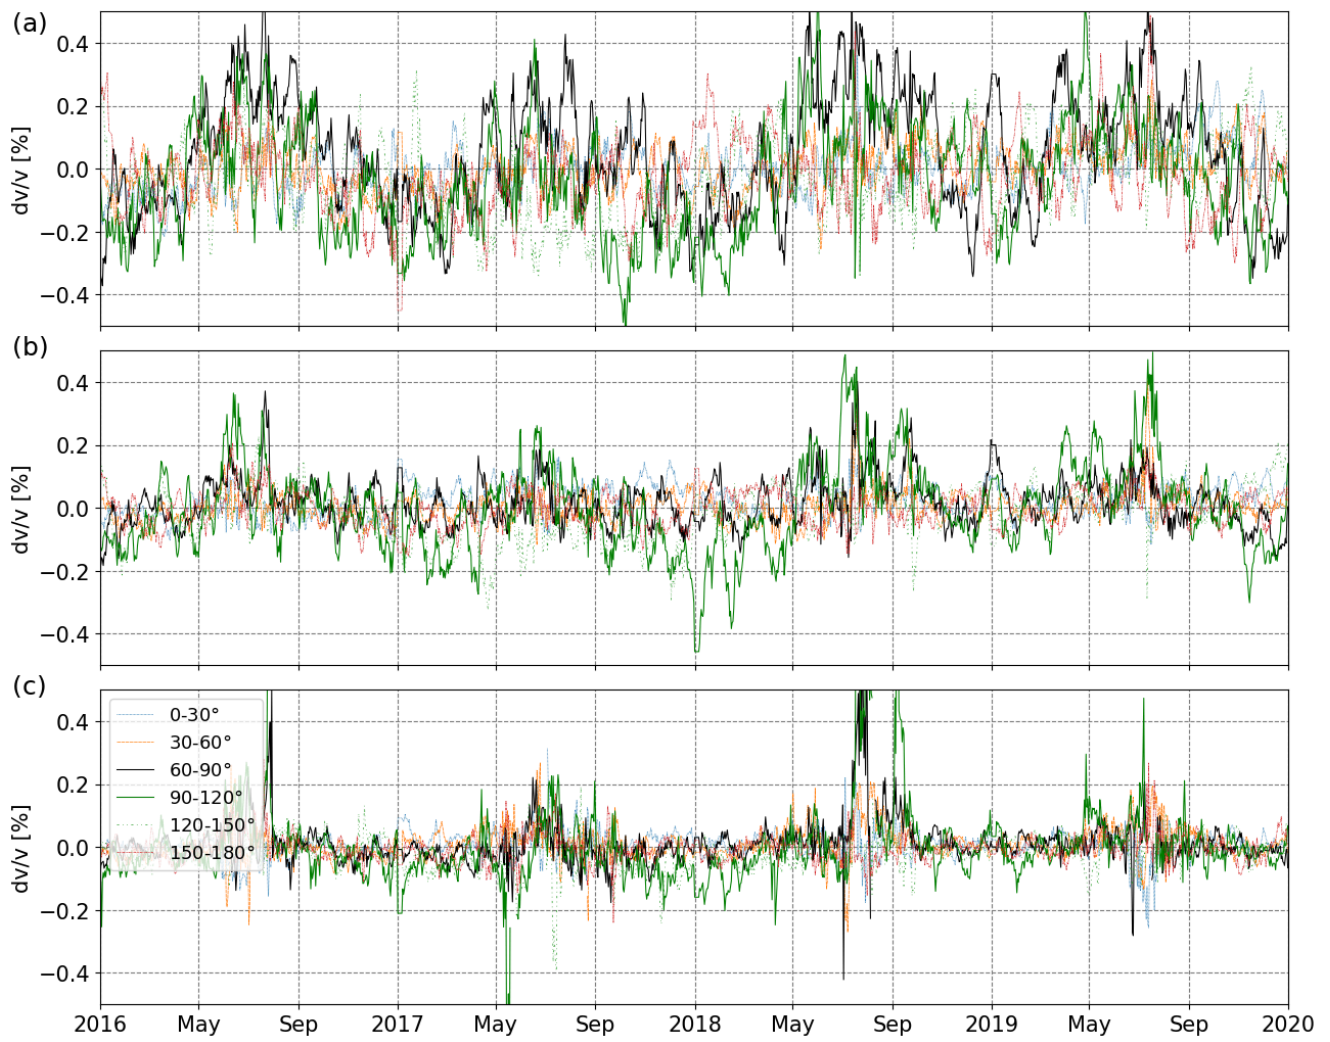

**Figure S3.**  $\delta v/v$  estimates for the entire region in the 0.1–0.5 Hz frequency band, computed using the first (a), second (b), and third (c) coda windows. The  $\delta v/v$  results are grouped by station-pair azimuth. In each panel, pairs with azimuths of 60–90° and 90–120° are highlighted with black and green lines, respectively.

**Table S1.** Robustness of the environmental correlations to station-pair subset selection of the W1 window. For each path selection, the table reports the number of station pairs, the strength or presence of the annual  $\delta v/v$  spectral peak, and the maximum lagged cross-correlation coefficients and corresponding lag times for temperature and groundwater level. Positive lag times indicate that  $\delta v/v$  lags the environmental variable. The selected subset with interstation distance <20 km and azimuth  $60^\circ$ - $120^\circ$  gives the clearest seasonal signal, while nearby distance and azimuth selections show similar temperature-related correlations and lag times, indicating that the inferred dominant thermal control is not an artefact of a narrowly tuned subset. W1 is shown because it has the clearest seasonal signal; the same tests were also performed for W2 and W3 and showed similar temperature-lag behaviour, although with slightly weaker correlations.

| Subset                                             | No. of pairs | Annual PSD peak amplitude | Max corr. with temperature | Temperature lag (days) | Max corr. with groundwater | Groundwater lag (days) |
|----------------------------------------------------|--------------|---------------------------|----------------------------|------------------------|----------------------------|------------------------|
| All pairs                                          | 190          | 3.16                      | 0.79                       | 23                     | 0.52                       | 107                    |
| Distance < 20 km, all azimuths                     | 65           | 28.38                     | 0.92                       | 19                     | 0.56                       | 108                    |
| All distances, azimuth $60^\circ$ - $120^\circ$    | 42           | 32.55                     | 0.90                       | 23                     | 0.59                       | 108                    |
| Distance < 20 km, azimuth $60^\circ$ - $120^\circ$ | 23           | 65.27                     | 0.93                       | 19                     | 0.64                       | 107                    |
| Distance < 25 km, azimuth $60^\circ$ - $120^\circ$ | 27           | 51.63                     | 0.89                       | 19                     | 0.61                       | 107                    |
| Distance < 20 km, azimuth $45^\circ$ - $135^\circ$ | 32           | 63.01                     | 0.91                       | 18                     | 0.60                       | 108                    |

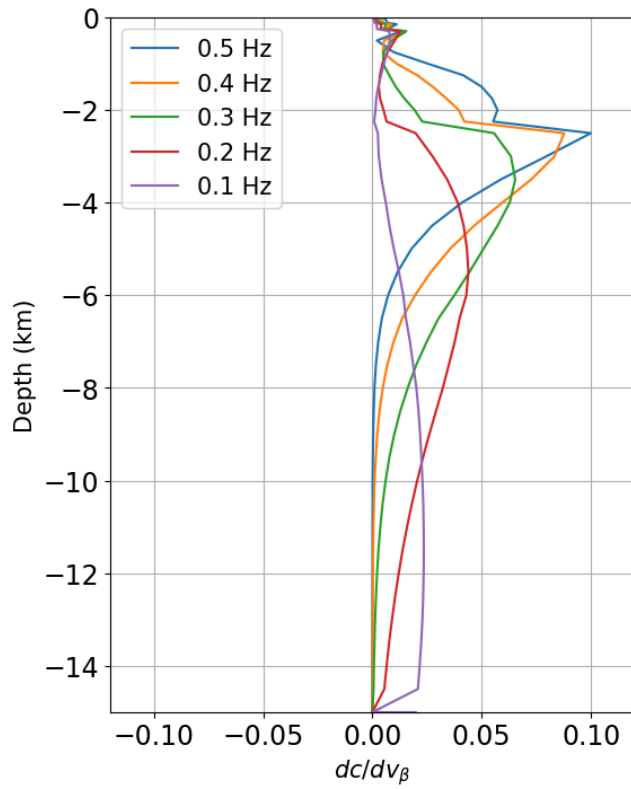

**Figure S4.** Rayleigh wave phase velocity sensitivity kernel for the study area for the frequency band 0.1-0.5 Hz using the velocity model by Malek et al. (2023) with the help of the Python program disba.

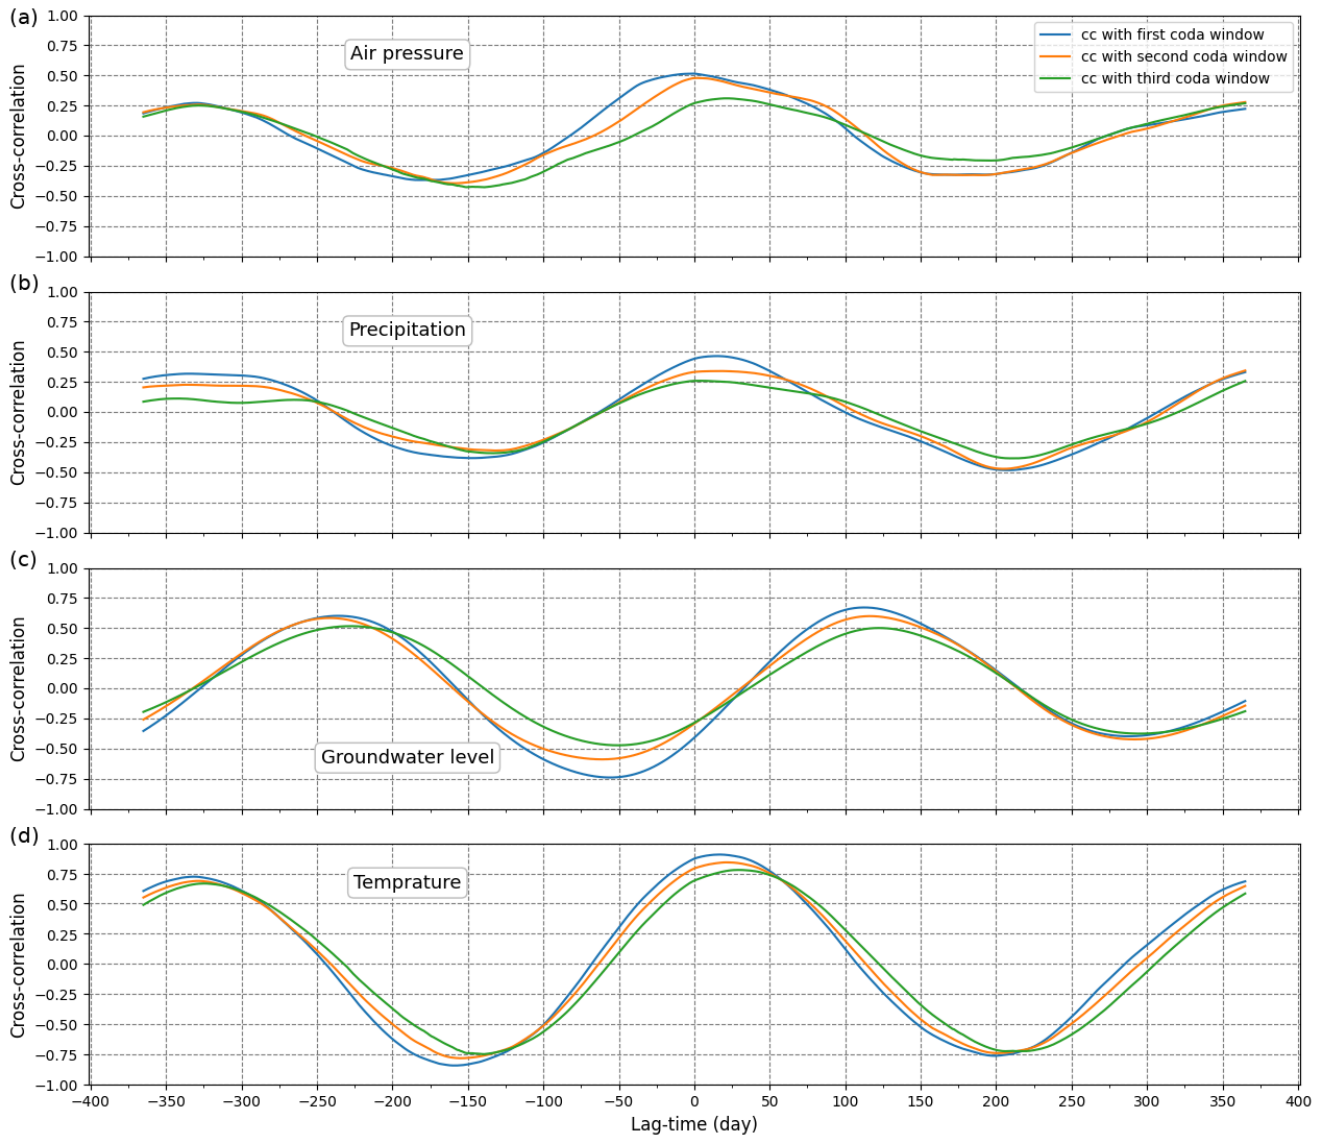

**Figure S5.** Cross-correlation estimates between  $\delta v/v$  and environmental variables after retaining periods longer than 100 days. Positive lag times indicate that  $\delta v/v$  lags the environmental signal.

**References :**

[1] Málek, J., Brokešová, J. & Novotný, O. New Velocity Structure of the Nový Kostel Earthquake-Swarm Region, West Bohemia, Determined by the Isometric Inversion. *Pure Appl. Geophys.* 180, 2111–2134 (2023). <https://doi.org/10.1007/s00024-023-03250-w>

[2] Luu, K. (2024). disba: Numba-accelerated computation of surface wave dispersion (v0.7.0). Zenodo. <https://doi.org/10.5281/zenodo.14534395>
